# Supplementary material
Source: PubMed Central journal article supplement (PMC4364869)

**Figure S1**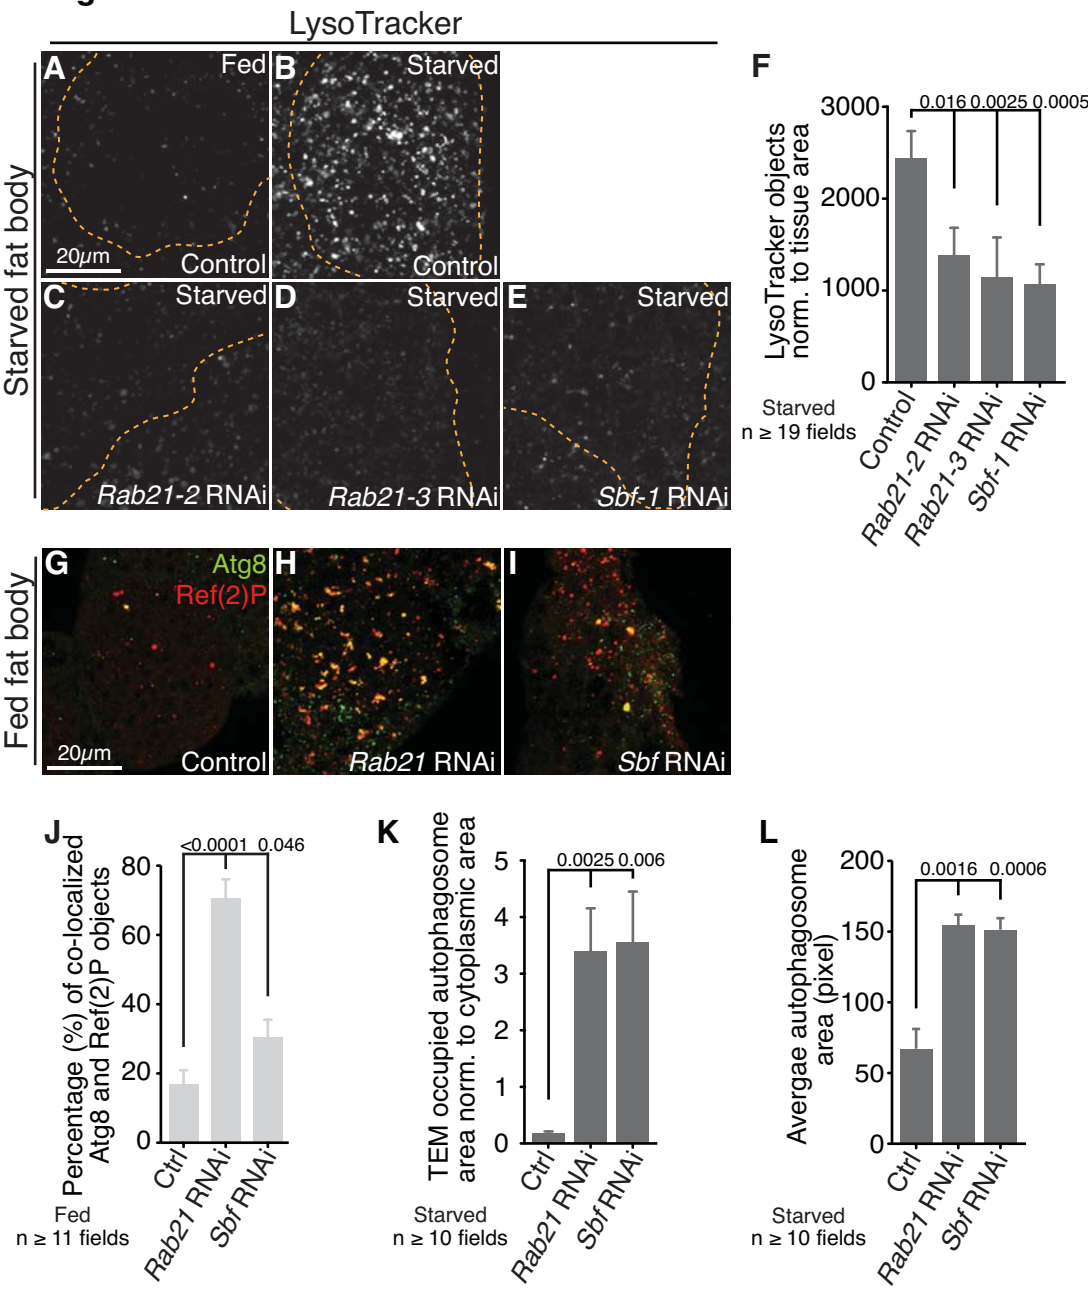

Supplement: embr0016-0297-sd1.pdf [file embr0016-0297-sd1.pdf]

**Figure S2**

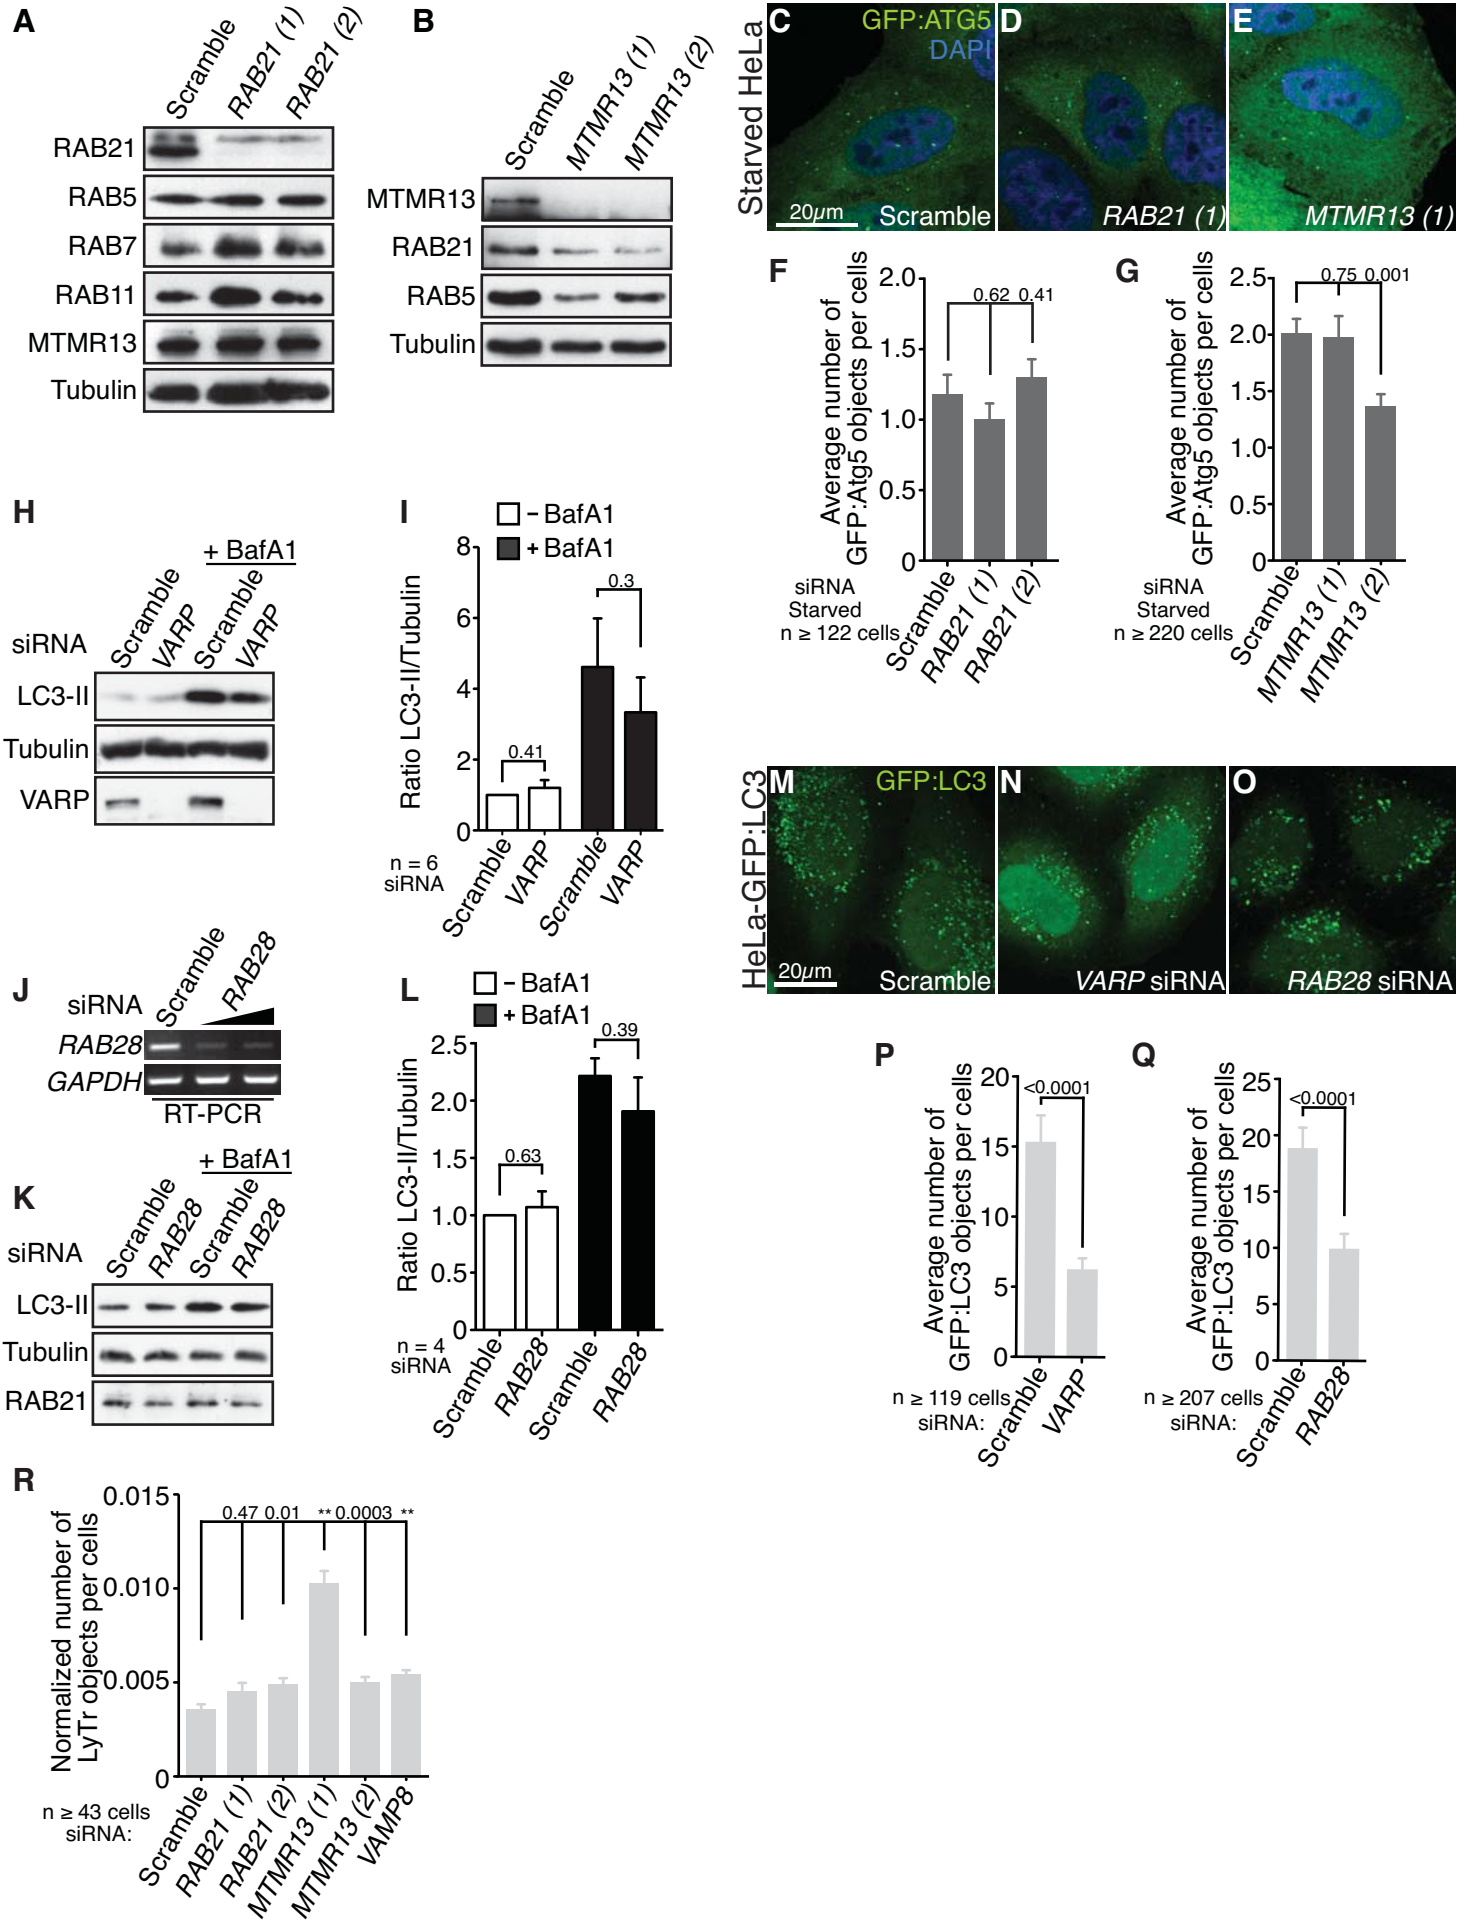

Supplement: embr0016-0297-sd2.pdf [file embr0016-0297-sd2.pdf]

**Figure S3**

Starved fat body

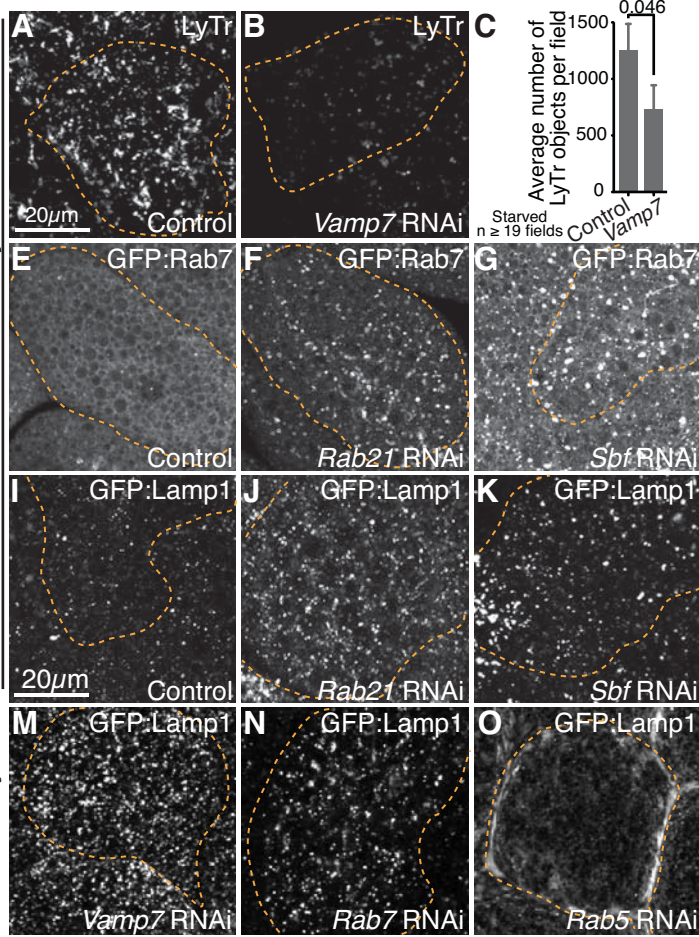

fat body

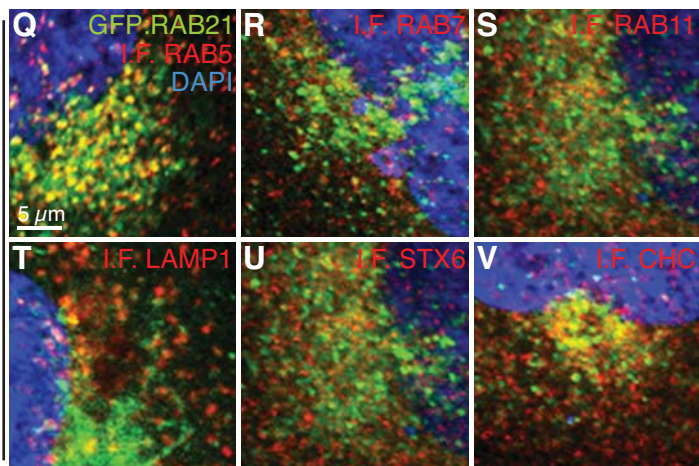

HeLa cells - GFP:VAMP8

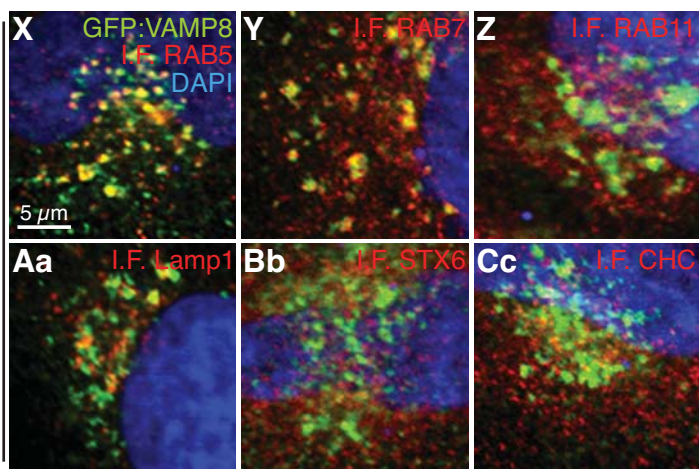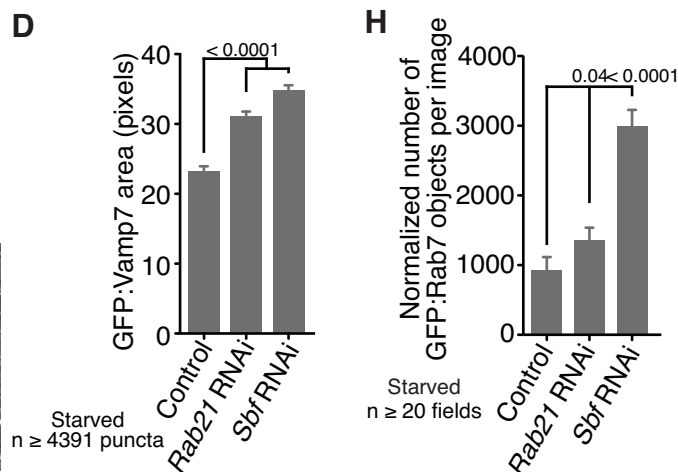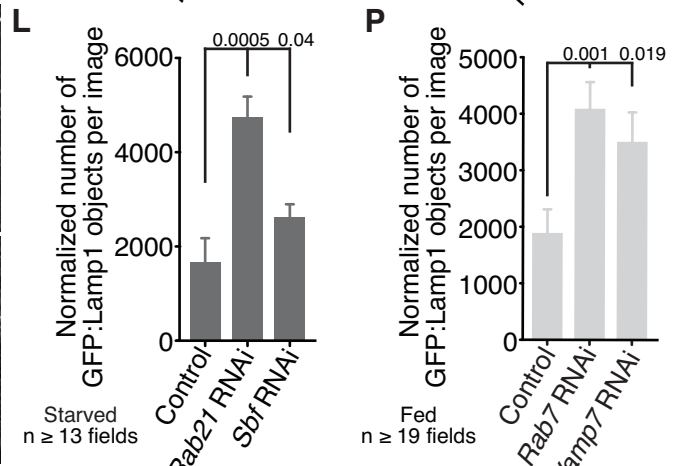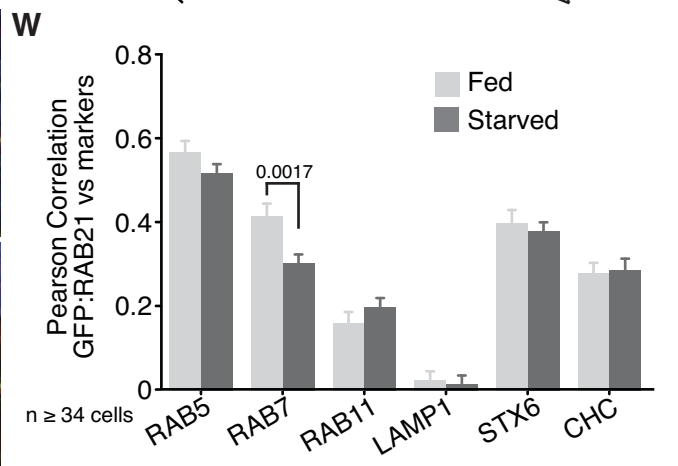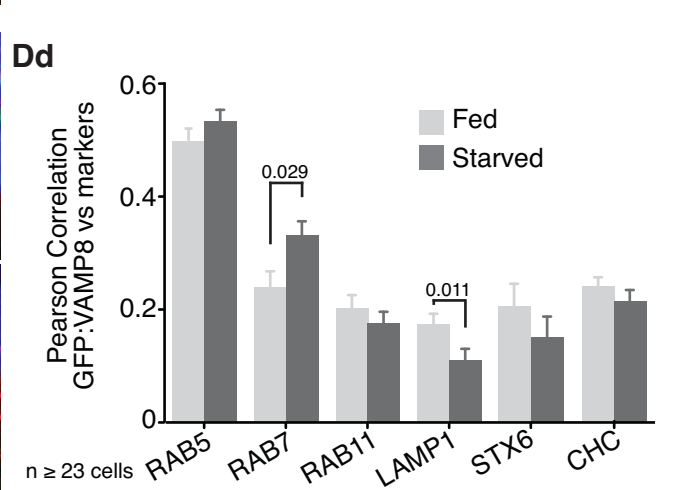

Supplement: embr0016-0297-sd3.pdf [file embr0016-0297-sd3.pdf]

**Figure S4**

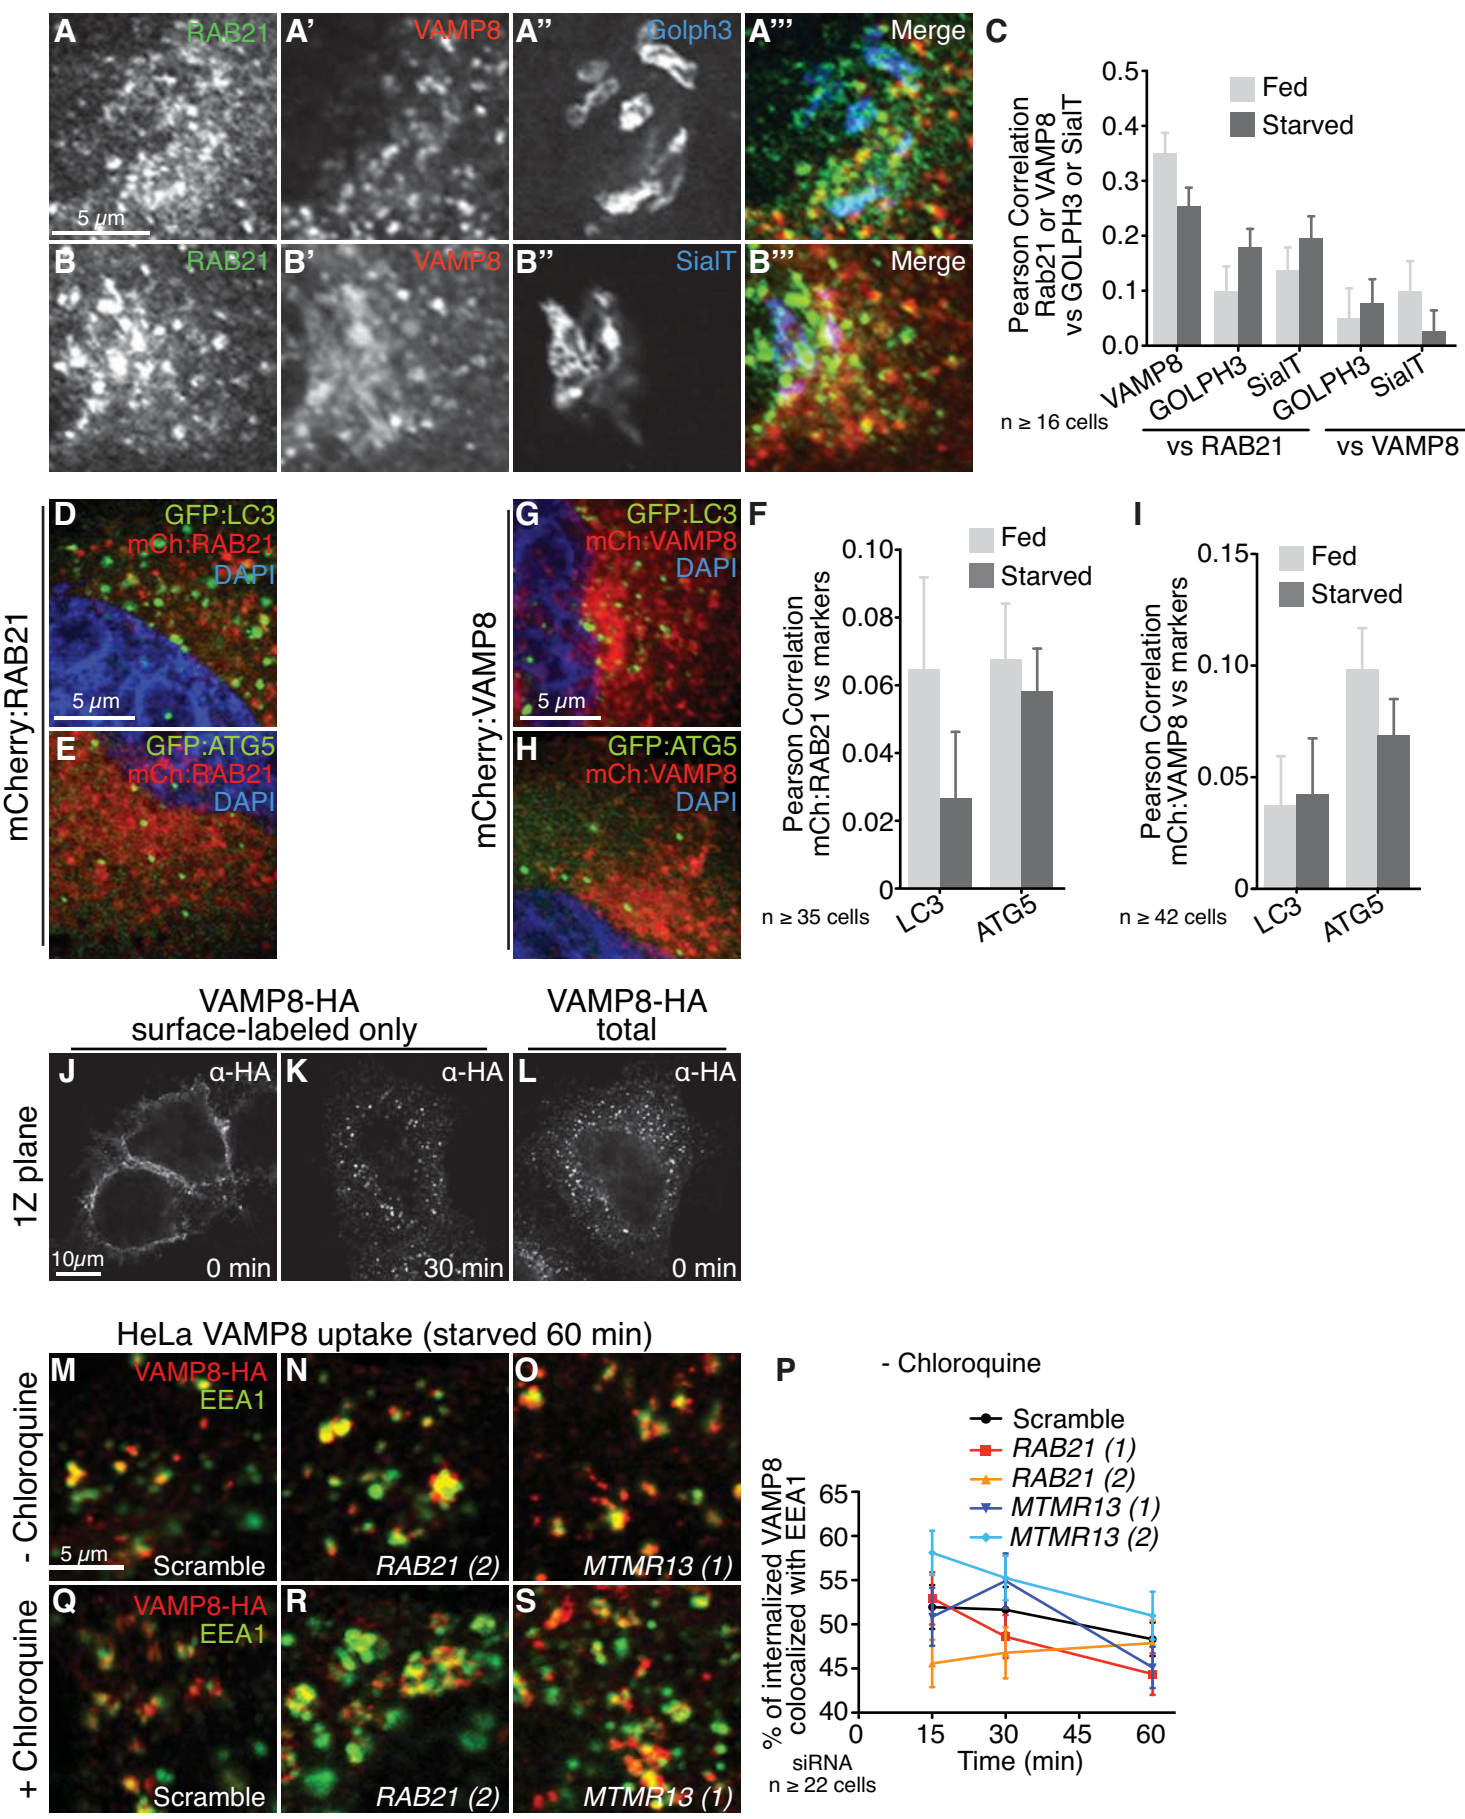

Supplement: embr0016-0297-sd4.pdf [file embr0016-0297-sd4.pdf]

**Figure S5**

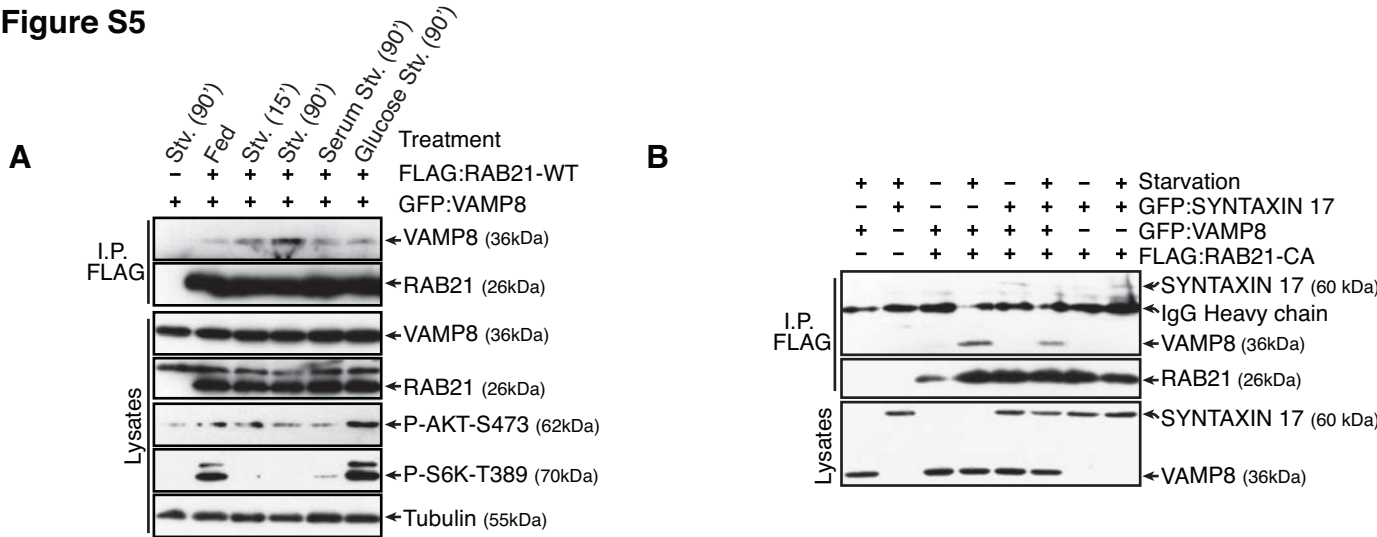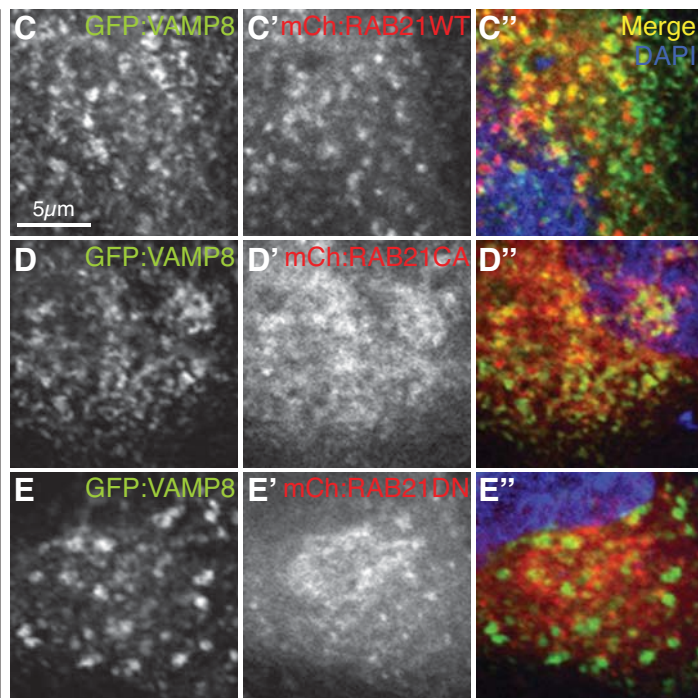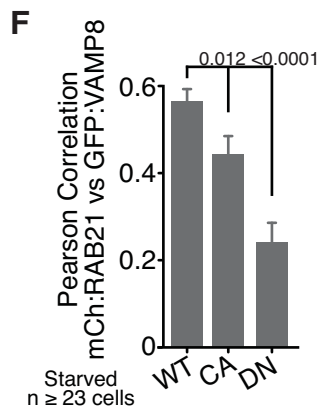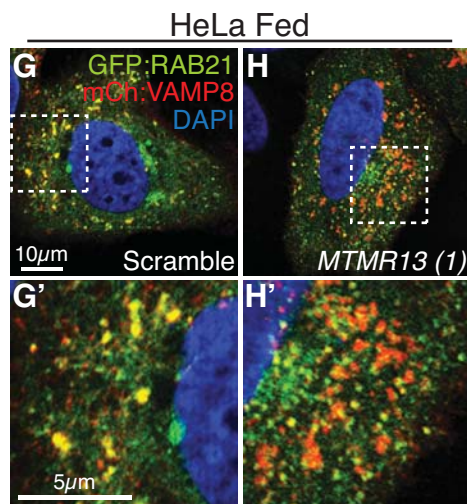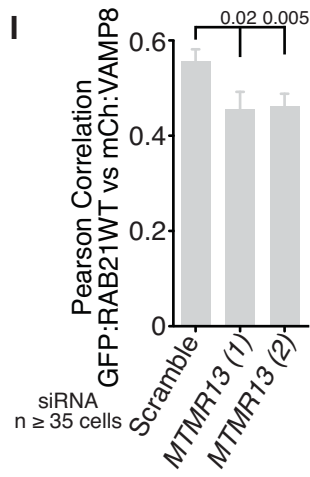

Supplement: embr0016-0297-sd5.pdf [file embr0016-0297-sd5.pdf]
